# Supplementary material
Source: Frontiers journal article supplement (https://www.frontiersin.org/articles/420979)
Supplement: Data_Sheet_1.pdf [file Data_Sheet_1.pdf]

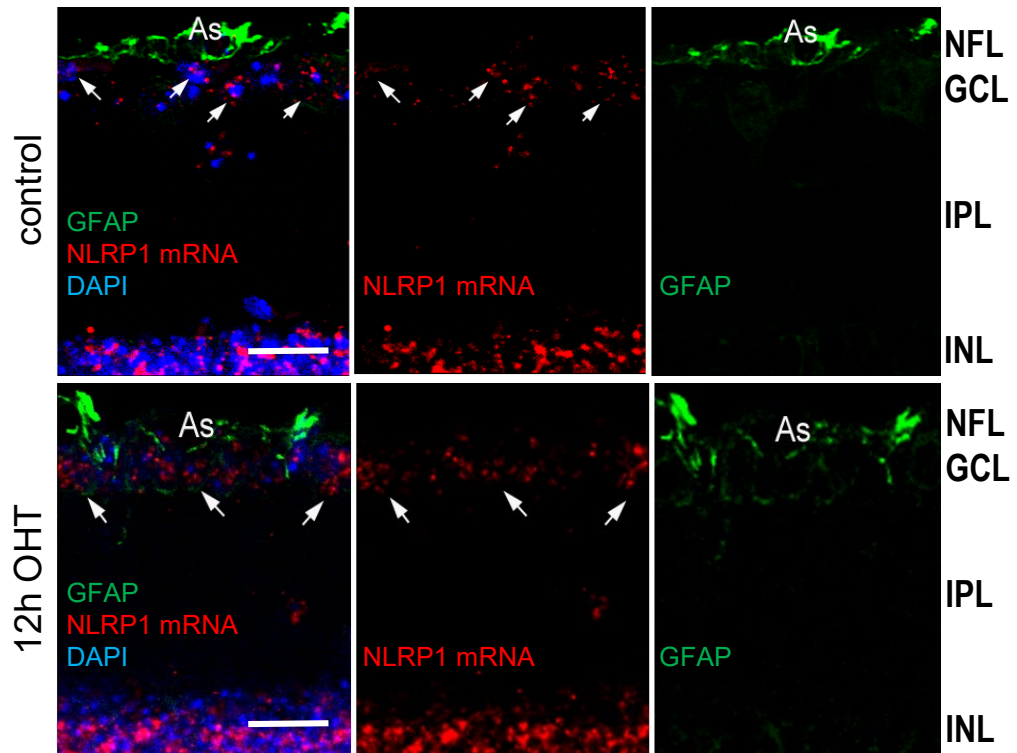

**Supplement Figure 1. NLRP1 gene transcripts in the inner retina.** RNAscope analysis of NLRP1 (red dots , arrows) transcript abundance in normotensive controls and experimental (OHT) retinas at 12h postinjury. Notice lack of co-localization with astrocytes (GFAP, green) in the NFL of the inner retina. Bar, 25  $\mu$ m

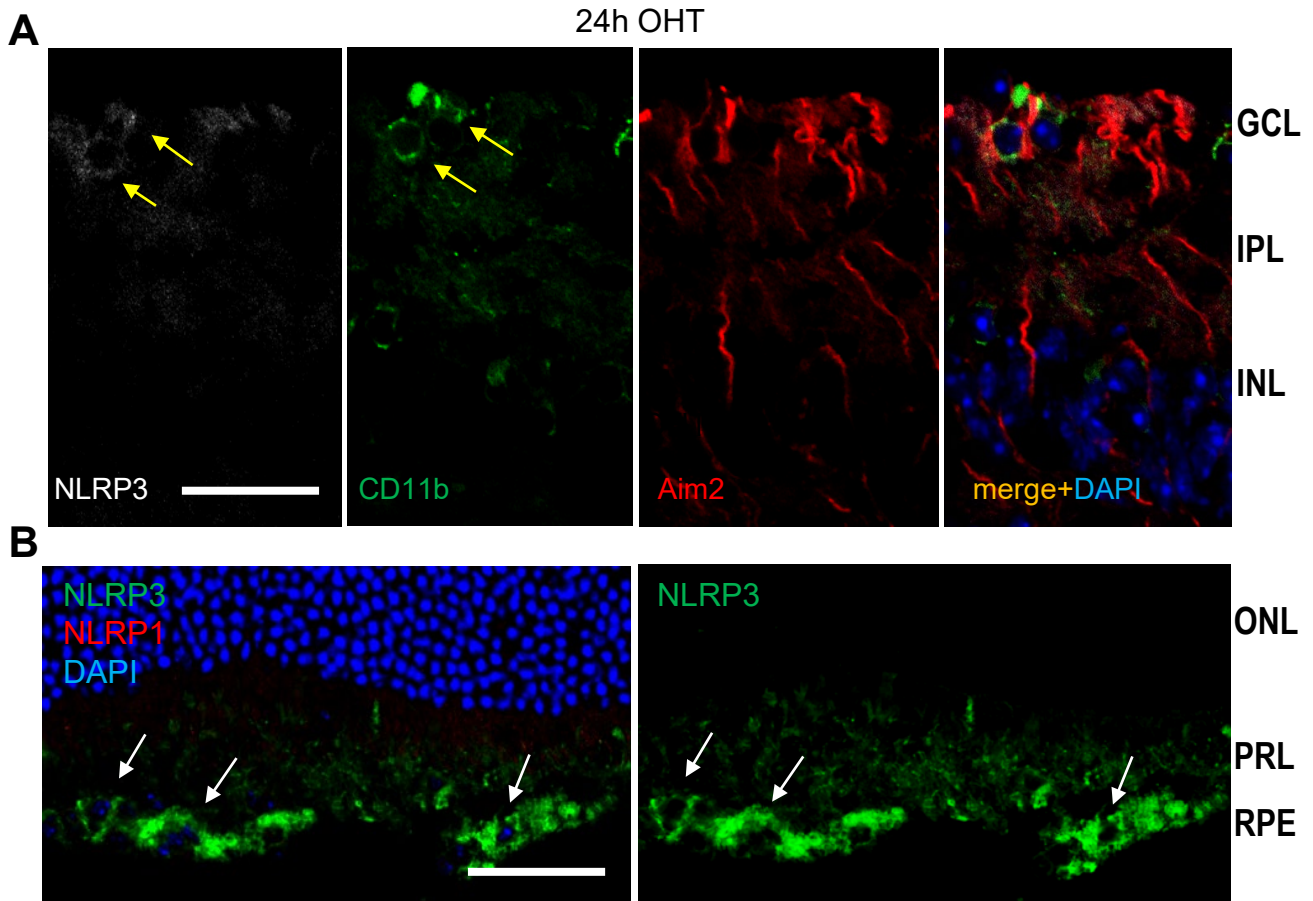

**Supplement Figure 2. Cellular expression of NLRP3 and Aim2 in the retina** (A) Antibody against NLRP3 (white) inflammasome protein label only CD11 $\beta$ <sup>+</sup> microglia/macrophages (yellow arrows); Aim2 antibody (red) label only Muller glia at 12h in post-OHT. (B). In the outer retina, a strong NLRP3 labeling co-localizes with retinal pigment epithelial cells (arrows); no NLRP1 (red) labeling is detected.

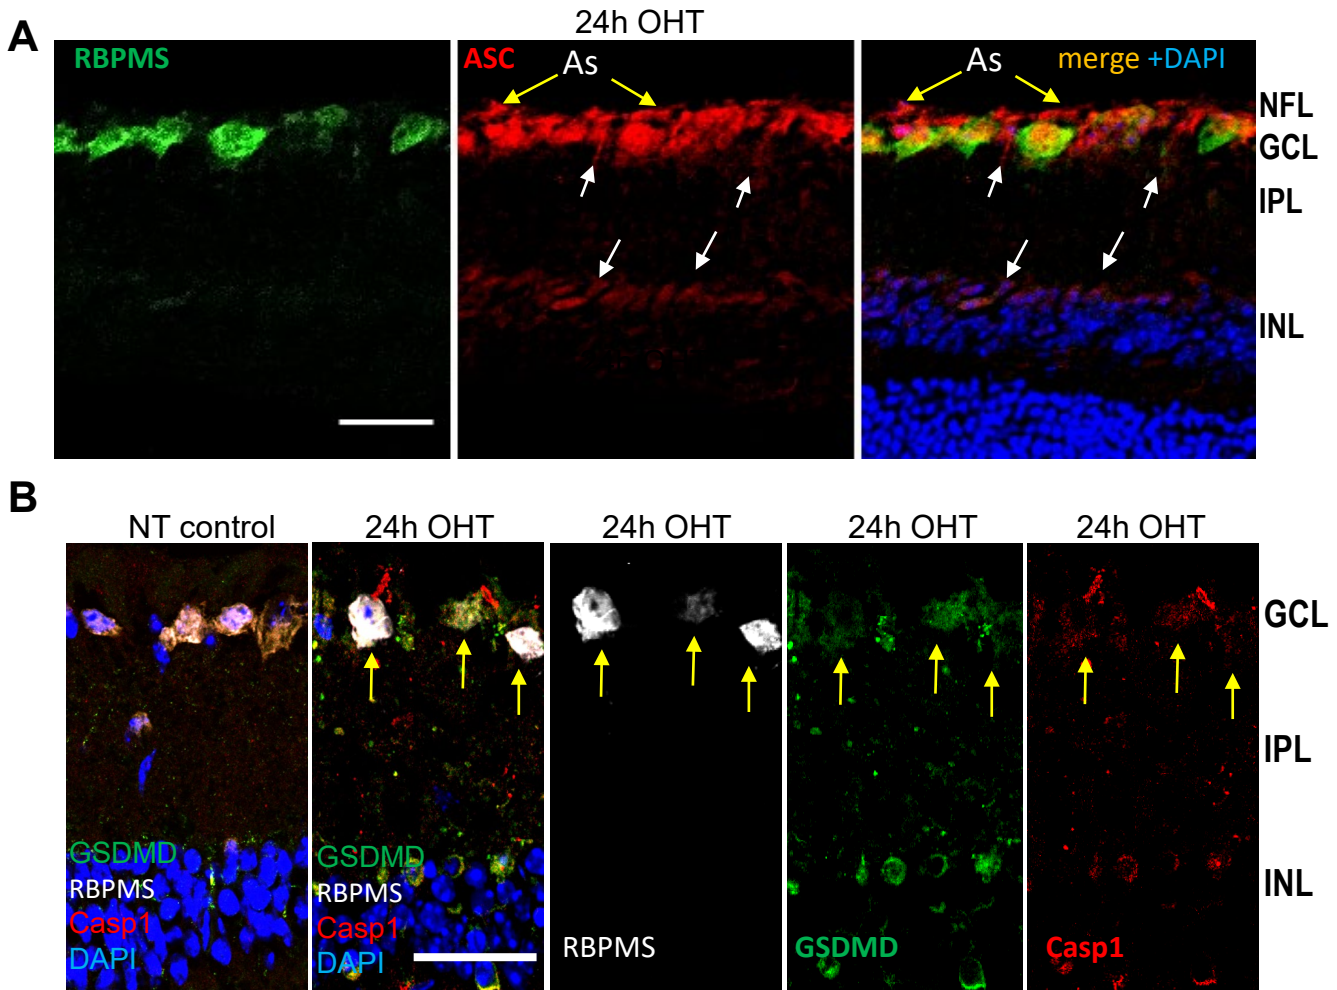

**Supplement Figure 3. Cellular expression of ASC and GSDMD proteins in the post-OHT retinas.**

The labeling for ASC (red) shows localization with Gsdmd<sup>+</sup> RGCs (green) and RBPMS-negative cells in the GCL and NFL layers at 24h post-OT injury. By cell morphology and localization, other ASC cells are astrocytes and Muller glia (arrows). Bar, 25  $\mu$ m. **(B)** GSDMD labeling in the GCL co-localizes (yellow arrows) with Casp1 staining predominantly in RGCs (RBPMS) at 24h post-OHT. In the INL, GSDMD labels a subpopulation of RBPMS-negative neurons also showed. Bar, 25  $\mu$ m on all panels

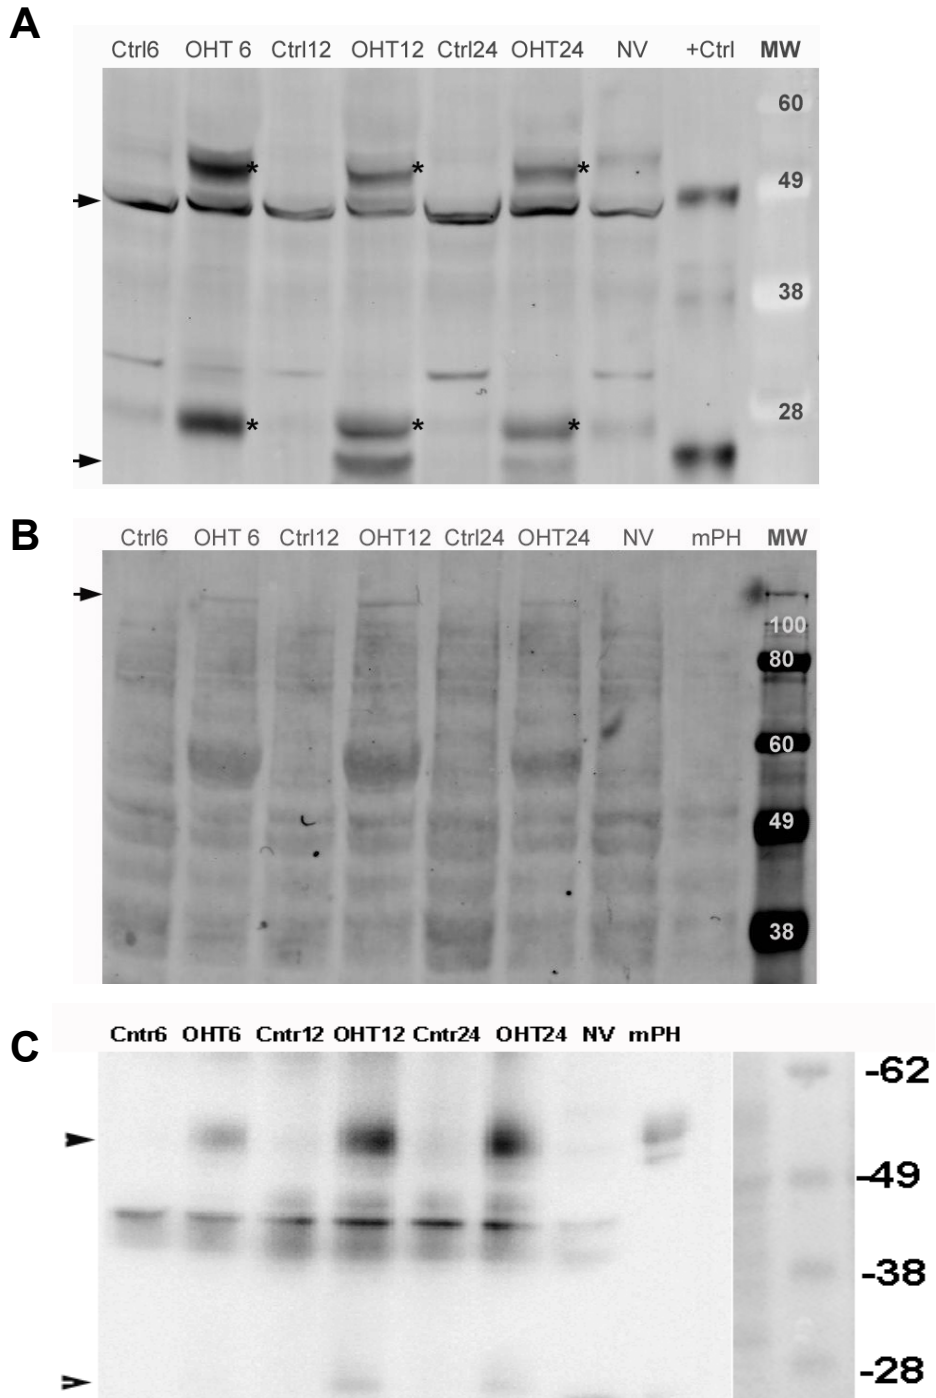

**Supplement Figure 4. Untrimmed Western blot images for Casp1 NLRP3 and GSDMD.**

- A. Western blot of vitreo-retinal lysates from OHT-challenged (OHT), normotensive control (Cntr) and naïve (NV) eyes probed with Caspase-1 antibodies (p20 Casper-1). Extracts from LPS-activated bone marrow mouse macrophages, treated with nigericin served as positive controls (+Ctrl).
- B. Same blot probed with antibodies against NLRP3 sensor protein.
- C. Western blot of vitreo-retinal lysates from OHT-challenged (OHT) eyes, probed with antibodies against GSDMD protein
